# Supplementary material for: Solution-processable nickel–chromium ternary oxide as an efficient hole transport layer for inverted planar perovskite solar cells
Source: Royal Society of Chemistry journal article supplement (doi:10.1039/d1ta06565c), 2021-01-01
Supplement: d1ta06565c1.pdf [file d1ta06565c1.pdf]

## Supplementary information

### **Solution-processable nickel-chromium ternary oxide as an efficient hole transport layer for inverted planar perovskite solar cells**

Yichu Zheng,<sup>‡a</sup> Bing Ge,<sup>‡b</sup> Li Rong Zheng,<sup>c</sup> Yu Hou,<sup>\*b</sup> Shuang Yang<sup>\*b</sup> and Hua Gui Yang<sup>b</sup>

<sup>a</sup> School of Mechatronic Engineering and Automation, Shanghai University, Shanghai, 200444, P. R. China

<sup>b</sup> Key Laboratory for Ultrafine Materials of Ministry of Education, Shanghai Engineering Research Center of Hierarchical Nanomaterials, School of Materials Science and Engineering, East China University of Science and Technology, Shanghai, 200237, P. R. China

<sup>c</sup> Beijing Synchrotron Radiation Facility, Institute of High Energy Physics, Chinese Academy of Sciences, Beijing, 100049, P. R. China

<sup>‡</sup> Y. Zheng and B. Ge contributed equally to this work.

\* Corresponding author: E-mail: [yhou@ecust.edu.cn](mailto:yhou@ecust.edu.cn), [syang@ecust.edu.cn](mailto:syang@ecust.edu.cn)

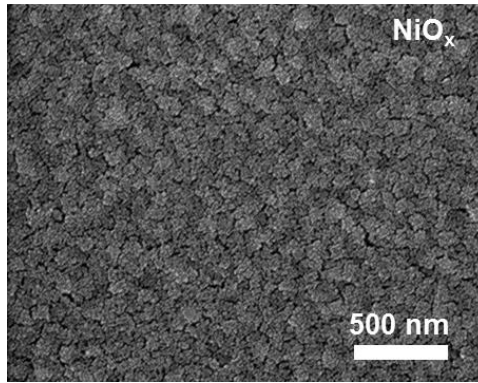

**Fig. S1.** Top-view SEM image of as-deposited NiO<sub>x</sub> film. The film is not as compact as NiCrO<sub>3</sub> film shown in Fig. 1a.

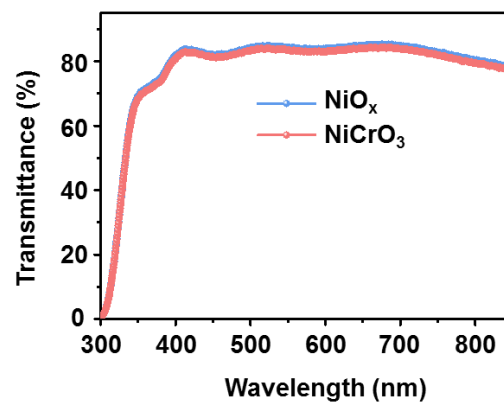

**Fig. S2** Transmittance spectra of NiO<sub>x</sub> and NiCrO<sub>3</sub> films coated on the FTO substrates. Both films have similar transparency which is highly transparent in the visible range from 300 to 850 nm.

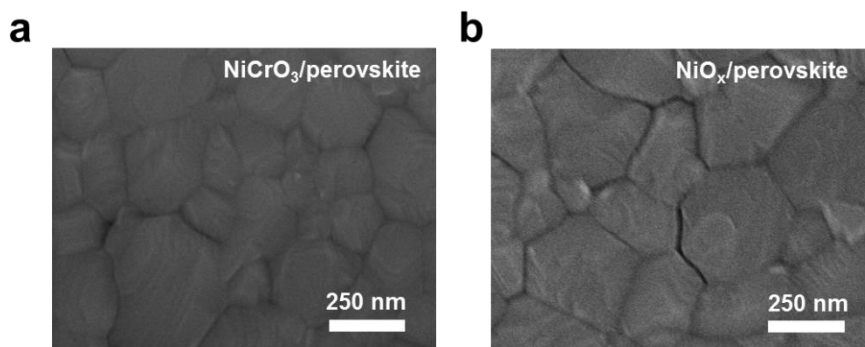

**Fig. S3** Top-view SEM images of MAPbI<sub>3</sub> perovskite films deposited on (a) NiO<sub>x</sub> and (b) NiCrO<sub>3</sub> films. A similar morphology of perovskites was observed for both samples.

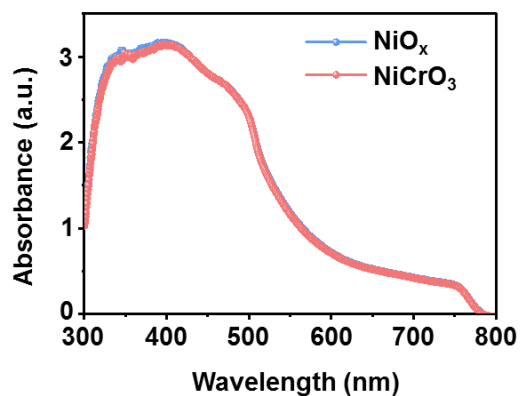

**Fig. S4** UV-vis absorption spectra of MAPbI<sub>3</sub> perovskite films coated on NiO<sub>x</sub> and NiCrO<sub>3</sub> films. Both perovskite films can harvest a wide range of UV and visible light up to 780 nm.

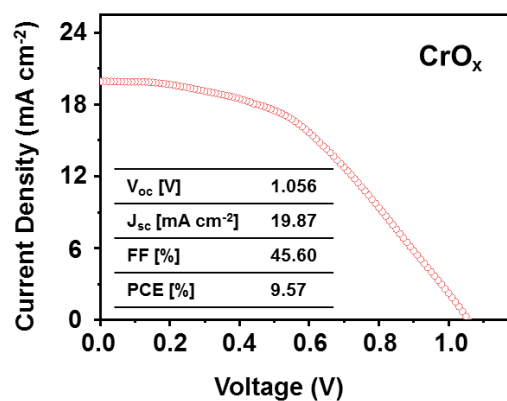

**Fig. S5** J-V characteristics of  $\text{CrO}_x$  HTL based PSC and corresponding photovoltaic parameters. The device was measured under AM 1.5G illumination with a scan rate of  $0.15 \text{ V s}^{-1}$ .

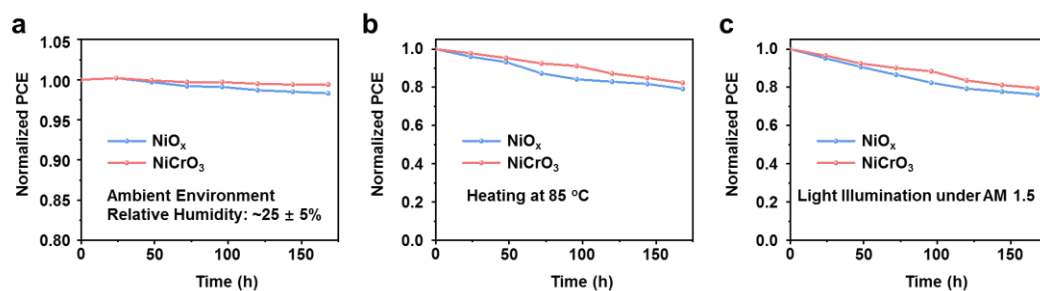

**Fig. S6** Stability metrics of unencapsulated  $\text{MAPbI}_3$  PSCs based on  $\text{NiO}_x$  and  $\text{NiCrO}_3$  HTLs under different environments: (a) ambient air with  $\sim 20 \pm 5\%$  relative humidity at  $25 \text{ }^\circ\text{C}$ , (b)  $85 \text{ }^\circ\text{C}$  in nitrogen atmosphere, and (c) AM 1.5G irradiation of  $\sim 100 \text{ mW cm}^{-2}$ .

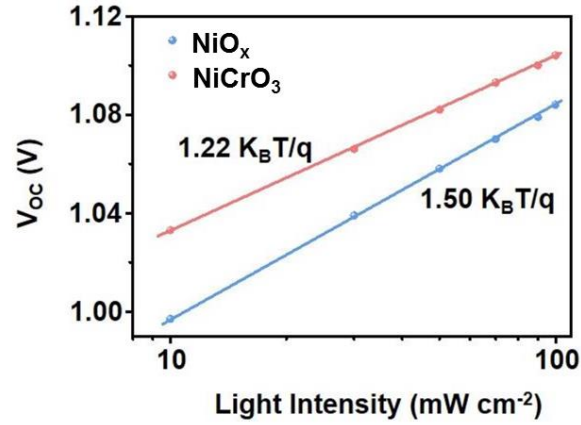

**Fig. S7**  $V_{OC}$  values of the PSCs based on NiO<sub>x</sub> and NiCrO<sub>3</sub> HTLs as function of light intensity. The correlation between  $V_{OC}$  and light intensity ( $I$ ) is described as  $dV_{OC}/d\ln I = nk_B T/q$ , where  $n$ ,  $k_B$ ,  $T$ , and  $q$  are the ideality factor, Boltzmann constant, room temperature, and elementary charge, respectively.

**Table S1** Summary of photovoltaic performances of perovskite solar cells based on ternary inorganic HTLs.

| Device                           | $V_{OC}$<br>[V] | $J_{SC}$<br>[mA cm <sup>-2</sup> ] | FF<br>[%] | PCE<br>[%] | Ref                                                              |
|----------------------------------|-----------------|------------------------------------|-----------|------------|------------------------------------------------------------------|
| NiCrO <sub>3</sub>               | 1.104           | 23.07                              | 78.30     | 19.93      | <b>This Work</b>                                                 |
| NiCo <sub>2</sub> O <sub>4</sub> | 1.063           | 23.02                              | 78.60     | 19.24      | <i>Adv. Funct. Mater.</i> <b>2019</b> , 29, 1904684              |
| LiCoO <sub>2</sub>               | 1.060           | 22.50                              | 80.00     | 19.05      | <i>J. Mater. Chem. A</i> <b>2018</b> , 6, 13751-13760            |
| CuCrO <sub>2</sub>               | 1.070           | 21.94                              | 81.00     | 19.00      | <i>Adv. Energy Mater.</i> <b>2018</b> , 8, 1702762               |
| CuGaO <sub>2</sub>               | 1.110           | 21.66                              | 77.00     | 18.51      | <i>Adv. Mater.</i> <b>2017</b> , 29, 1604984                     |
| NiCo <sub>2</sub> O <sub>4</sub> | 1.070           | 21.86                              | 78.00     | 18.23      | <i>Adv. Energy Mater.</i> <b>2018</b> , 8, 1702722               |
| CuFeO <sub>2</sub>               | 1.010           | 23.60                              | 65.00     | 15.60      | <i>ACS Appl. Mater. Interfaces</i> <b>2019</b> , 11, 45142-45149 |
